# Supplementary material for: Manganese clusters of aromatic oximes: synthesis, structure and magnetic properties
Source: Royal Society of Chemistry journal article supplement (doi:10.1039/c6dt03207a), 2016-01-01
Supplement: c6dt03207a1.pdf [file c6dt03207a1.pdf]

## Electronic Supplementary Information

# Manganese clusters of aromatic oximes: synthesis, structure and magnetic properties

Zilu Chen,<sup>\*a</sup> Zhaobo Hu,<sup>a</sup> Yisheng Li,<sup>a</sup> Yuning Liang,<sup>a</sup> Xinyu Wang,<sup>a</sup> Li Ouyang,<sup>a</sup> Qin Zhao,<sup>a</sup>

Haiyan Cheng,<sup>a</sup> Fupei Liang<sup>\*a,b</sup>

<sup>a</sup>State Key Laboratory for the Chemistry and Molecular Engineering of Medicinal Resources, School of Chemistry and Pharmaceutical Sciences, Guangxi Normal University, Guilin 541004, P R China. E-mail: zlchen@mailbox.gxnu.edu.cn

<sup>b</sup>Guangxi Key Laboratory of Electrochemical and Magnetochemical Functional Materials, College of Chemistry and Bioengineering, Guilin University of Technology, Guilin 541004, P. R. China. E-mail: fliangoffice@yahoo.com

### Table of content:

**Table S1.** Crystallographic data and structure refinement parameters for **1-3**.

**Table S2.** Crystallographic data and structure refinement parameters for **4-5**.

**Table S3.** Selected bond lengths / Å and bond angles / ° of **1**.

**Table S4.** Selected bond lengths / Å and bond angles / ° of **2**.

**Table S5.** Selected bond lengths / Å and bond angles / ° of **3**.

**Table S6.** Selected bond lengths / Å and bond angles / ° of **4**.

**Table S7.** Selected bond lengths / Å and bond angles / ° of **5**.

**Table S8.** Bond Valence Sum (BVS) calculations for the Mn atoms in **1-6**.

**Table S9.** Hydrogen bonds for **1-3** [Å and °].

**Table S10.**  $\pi\cdots\pi$  interaction data of **1-4**.

**Fig. S1** PXRD patterns of **1**.

**Fig. S2** PXRD patterns of **2**.

**Fig. S3** PXRD patterns of **3**.

**Fig. S4** PXRD patterns of **4**.

**Fig. S5** PXRD patterns of **5**.

**Fig. S6** One-dimensional supramolecular H-bonded chain of **1**. Purple broken lines represent hydrogen bonds.

**Fig. S7** A show of the hydrogen bonds (purple broken lines) and  $\pi\cdots\pi$  stacking interactions (green broken lines) in the supramolecular one-dimensional chain of **1**.

**Fig. S8** A show of the three-dimensional supramolecular structure of **1** formed from one-dimensional supramolecular chains by  $\pi\cdots\pi$  stacking interactions. The bonds in different chains are highlighted with different colors.

**Fig. S9.** The dimer of **2** formed by hydrogen bonds (purple broken lines) and  $\pi\cdots\pi$  stacking interactions (green broken lines).

**Fig. S10** Packing diagram of the dimers in **2** by  $\pi\cdots\pi$  stacking interactions. The bonds in one dimer are highlighted with green color.

**Fig. S11** The dimer of **3** formed by hydrogen bonds (purple broken lines).

**Fig. S12** Two-dimensional supramolecular sheet of **3** in the ab plane formed from the dimers through  $\pi\cdots\pi$  stacking interactions.

**Fig. S13** Three-dimensional supramolecular structure of **3** formed from the supramolecular sheets through  $\pi\cdots\pi$  stacking interactions.

**Fig. S14** a) The  $\text{Mn}_8\text{O}_4^{16+}$  skeleton in **4** with the weak Mn–O bonds represented by broken lines. b) A schematic show of the inner and outer tetrahedral  $\text{Mn}_4$  skeletons of **4**.

**Fig. S15** One-dimensional supramolecular chain of **4** formed from octanuclear units by  $\pi\cdots\pi$  stacking interactions (green broken lines).

**Fig. S16** a) Packing diagram of **4** with the one-dimensional supramolecular chain highlighted

by green colors. b) A schematic show of the packing diagram of the trinuclear units (red spheres) of **4**.

**Fig. S17** a) The  $[\text{Mn}^{\text{II}}_4\text{Mn}^{\text{III}}_4\text{O}_4]^{12+}$  skeleton in **5**. b) A schematic show of the inner and outer tetrahedral  $\text{Mn}_4$  skeletons of **5**.

**Fig. S18** a) A packing diagram of the octanuclear nuclear units of **5** with all solvent molecules and hydrogen atoms omitted. b) A schematic show of the octanuclear nuclear units (blue spheres) of **5**.

**Fig. S19** The plot of  $\chi_m^{-1}$  vs  $T$  for **1** in the temperature range of 2.0-300 K. The solid line represents the fitting by Curie-Weiss law in the temperature range of 70-300 K.

**Fig. S20** The plot of  $\chi_m^{-1}$  vs  $T$  for **2** in the temperature range of 2.0-300 K. The solid line represents the fitting by Curie-Weiss law in the temperature range of 70-300 K.

**Fig. S21** The plot of  $\chi_m^{-1}$  vs  $T$  for **3** in the temperature range of 1.8-300 K. The solid line represents the fitting by Curie-Weiss law in the temperature range of 70-300 K.

**Fig. S22** The plot of  $\chi_m^{-1}$  vs  $T$  for **4** in the temperature range of 2.0-300 K. The solid line represents the fitting by Curie-Weiss law.

**Fig. S23** The plot of  $\chi_m^{-1}$  vs  $T$  for **5** in the temperature range of 2.0-300 K. The solid line represents the fitting by Curie-Weiss law.

**Fig. S24** Temperature-dependent ac magnetic susceptibilities of **1** under different frequencies with a zero DC field and an oscillating field of 2.5 Oe. Solid lines are guides for the eye.

**Fig. S25** Temperature-dependent ac magnetic susceptibilities of **2** under different frequencies with a zero DC field and an oscillating field of 2.5 Oe. Solid lines are guides for the eye.

**Fig. S26** Temperature-dependent ac magnetic susceptibilities of **3** under different frequencies with a zero DC field and an oscillating field of 2.5 Oe. Solid lines are guides for the eye.

**Fig. S27** Temperature-dependent ac magnetic susceptibilities of **4** under different frequencies with a zero DC field and an oscillating field of 2.5 Oe. Solid lines are guides for the eye.

**Fig. S28** Temperature-dependent ac magnetic susceptibilities of **5** under different frequencies with a zero DC field and an oscillating field of 2.5 Oe. Solid lines are guides for the eye.

**Table S1** Crystallographic data and structure refinement parameters for **1-3**.

|                                                                  | <b>1</b>                                                                         | <b>2</b>                                                                       | <b>3</b>                                                                                           |
|------------------------------------------------------------------|----------------------------------------------------------------------------------|--------------------------------------------------------------------------------|----------------------------------------------------------------------------------------------------|
| formula                                                          | C <sub>37</sub> H <sub>43</sub> ClMn <sub>3</sub> N <sub>9</sub> O <sub>17</sub> | C <sub>40</sub> H <sub>29</sub> Mn <sub>3</sub> N <sub>6</sub> O <sub>11</sub> | C <sub>225</sub> H <sub>168</sub> Cl <sub>4</sub> Mn <sub>12</sub> N <sub>40</sub> O <sub>51</sub> |
| fw                                                               | 1086.07                                                                          | 934.51                                                                         | 5049.07                                                                                            |
| Temperature / K                                                  | 298(2) K                                                                         | 153(2)                                                                         | 298(2)                                                                                             |
| Wavelength / Å                                                   | 0.71073 Å                                                                        | 0.71073                                                                        | 0.71073                                                                                            |
| Crystal system                                                   | Hexagonal                                                                        | Monoclinic                                                                     | Triclinic                                                                                          |
| Space group                                                      | <i>P</i> 6 <sub>1</sub>                                                          | <i>P</i> 2 <sub>1</sub> / <i>c</i>                                             | <i>P</i> $\bar{1}$                                                                                 |
| <i>a</i> / Å                                                     | 20.1846(4)                                                                       | 10.8393(15)                                                                    | 17.1115(8)                                                                                         |
| <i>b</i> / Å                                                     | 20.1846(4)                                                                       | 18.418(3)                                                                      | 18.8978(6)                                                                                         |
| <i>c</i> / Å                                                     | 20.1893(6)                                                                       | 18.329(3)                                                                      | 19.9978(6)                                                                                         |
| $\alpha$ / °                                                     | 90                                                                               | 90                                                                             | 67.248(3)                                                                                          |
| $\beta$ / °                                                      | 90                                                                               | 92.871(2)                                                                      | 89.768(3)                                                                                          |
| $\gamma$ / °                                                     | 120                                                                              | 90                                                                             | 70.924(4)                                                                                          |
| <i>V</i> / Å <sup>3</sup>                                        | 7123.4(3)                                                                        | 3654.6(9)                                                                      | 5580.2(4)                                                                                          |
| <i>Z</i>                                                         | 6                                                                                | 4                                                                              | 1                                                                                                  |
| <i>D</i> <sub>c</sub> / g cm <sup>-3</sup>                       | 1.519                                                                            | 1.698                                                                          | 1.502                                                                                              |
| $\mu$ / mm <sup>-1</sup>                                         | 0.920                                                                            | 1.096                                                                          | 0.790                                                                                              |
| $\theta$ / °                                                     | 2.85 to 25.09                                                                    | 1.57 to 25.01                                                                  | 2.92 to 25.02                                                                                      |
| F(000)                                                           | 3336                                                                             | 1896                                                                           | 2574                                                                                               |
| Crystal size / mm                                                | 0.28 × 0.25 × 0.19                                                               | 0.29 × 0.26 × 0.19                                                             | 0.28 × 0.24 × 0.20                                                                                 |
| Reflections collected                                            | 80754                                                                            | 26301                                                                          | 52316                                                                                              |
| Reflections unique                                               | 8404                                                                             | 6425                                                                           | 19658                                                                                              |
| <i>R</i> <sub>int</sub>                                          | 0.0796                                                                           | 0.0314                                                                         | 0.0442                                                                                             |
| GOF on <i>F</i> <sup>2</sup>                                     | 1.011                                                                            | 1.063                                                                          | 1.049                                                                                              |
| <i>R</i> <sub>1</sub> <sup>a</sup> ( <i>I</i> > 2σ( <i>I</i> ))  | 0.0510                                                                           | 0.0366                                                                         | 0.0603                                                                                             |
| <i>wR</i> <sub>2</sub> <sup>b</sup> ( <i>I</i> > 2σ( <i>I</i> )) | 0.1159                                                                           | 0.0912                                                                         | 0.1642                                                                                             |
| <i>R</i> <sub>1</sub> <sup>a</sup> (all data)                    | 0.0785                                                                           | 0.0467                                                                         | 0.0959                                                                                             |
| <i>wR</i> <sub>2</sub> <sup>b</sup> (all data)                   | 0.1306                                                                           | 0.0983                                                                         | 0.1951                                                                                             |

**Table S2** Crystallographic data and structure refinement parameters for **4-5**.

|                                                                  | <b>4</b>                                                                          | <b>5</b>                                                                          |
|------------------------------------------------------------------|-----------------------------------------------------------------------------------|-----------------------------------------------------------------------------------|
| formula                                                          | C <sub>123</sub> H <sub>101</sub> Mn <sub>8</sub> N <sub>27</sub> O <sub>25</sub> | C <sub>177</sub> H <sub>129</sub> Mn <sub>8</sub> N <sub>15</sub> O <sub>37</sub> |
| fw                                                               | 2796.83                                                                           | 3497.47                                                                           |
| Temperature / K                                                  | 153(2)                                                                            | 185(2)                                                                            |
| Wavelength / Å                                                   | 0.71073                                                                           | 0.71073                                                                           |
| Crystal system                                                   | Triclinic                                                                         | Cubic                                                                             |
| Space group                                                      | $P\bar{1}$                                                                        | $Pa\bar{3}$                                                                       |
| <i>a</i> / Å                                                     | 16.5792(19)                                                                       | 31.8857(4)                                                                        |
| <i>b</i> / Å                                                     | 16.8624(19)                                                                       | 31.8857(4)                                                                        |
| <i>c</i> / Å                                                     | 23.487(3)                                                                         | 31.8857(4)                                                                        |
| $\alpha$ / °                                                     | 77.380(2)                                                                         | 90                                                                                |
| $\beta$ / °                                                      | 82.470(2)                                                                         | 90                                                                                |
| $\gamma$ / °                                                     | 76.586(2)                                                                         | 90                                                                                |
| <i>V</i> / Å <sup>3</sup>                                        | 6210.3(12)                                                                        | 32418.1(7)                                                                        |
| <i>Z</i>                                                         | 2                                                                                 | 8                                                                                 |
| <i>D</i> <sub>c</sub> / g cm <sup>-3</sup>                       | 1.496                                                                             | 1.433                                                                             |
| $\mu$ / mm <sup>-1</sup>                                         | 0.869                                                                             | 0.685                                                                             |
| $\theta$ / °                                                     | 0.89 to 25.02                                                                     | 1.81 to 23.64 deg.                                                                |
| F(000)                                                           | 2856                                                                              | 14336                                                                             |
| Crystal size / mm                                                | 0.32 × 0.25 × 0.18                                                                | 0.30 × 0.28 × 0.26                                                                |
| Reflections collected                                            | 48250                                                                             | 138386                                                                            |
| Reflections unique                                               | 21746                                                                             | 7817                                                                              |
| <i>R</i> <sub>int</sub>                                          | 0.0489                                                                            | 0.1075                                                                            |
| GOF on <i>F</i> <sup>2</sup>                                     | 1.022                                                                             | 1.153                                                                             |
| <i>R</i> <sub>1</sub> <sup>a</sup> ( <i>I</i> > 2σ( <i>I</i> ))  | 0.0493                                                                            | 0.0997                                                                            |
| <i>wR</i> <sub>2</sub> <sup>b</sup> ( <i>I</i> > 2σ( <i>I</i> )) | 0.1352                                                                            | 0.2500                                                                            |
| <i>R</i> <sub>1</sub> <sup>a</sup> (all data)                    | 0.0847                                                                            | 0.1492                                                                            |
| <i>wR</i> <sub>2</sub> <sup>b</sup> (all data)                   | 0.1634                                                                            | 0.2995                                                                            |

**Table S3** Selected bond lengths / Å and bond angles / ° of **1**.

|             |            |             |            |            |            |
|-------------|------------|-------------|------------|------------|------------|
| Mn1–O1      | 1.873(3)   | Mn2–O1      | 1.885(3)   | Mn3–O9     | 1.896(4)   |
| Mn1–O3      | 1.907(4)   | Mn2–O6      | 1.906(4)   | Mn3–O1     | 1.896(4)   |
| Mn1–O5      | 1.941(3)   | Mn2–O8      | 1.921(4)   | Mn3–O2     | 1.933(4)   |
| Mn1–N1      | 2.025(4)   | Mn2–N3      | 2.030(4)   | Mn3–N5     | 1.997(5)   |
| Mn1–O14     | 2.264(5)   | Mn2–O12     | 2.212(6)   | Mn3–Cl1    | 2.421(2)   |
| Mn1–O13     | 2.271(4)   | Mn2–O11     | 2.232(4)   |            |            |
| O1–Mn1–O3   | 177.6(2)   | O1–Mn2–O6   | 176.9(2)   | O9–Mn3–O1  | 159.6(2)   |
| O1–Mn1–O5   | 93.41(15)  | O1–Mn2–O8   | 92.04(16)  | O9–Mn3–O2  | 85.28(16)  |
| O3–Mn1–O5   | 85.57(15)  | O6–Mn2–O8   | 86.41(17)  | O1–Mn3–O2  | 91.18(15)  |
| O1–Mn1–N1   | 89.03(16)  | O1–Mn2–N3   | 90.16(16)  | O9–Mn3–N5  | 90.43(17)  |
| O3–Mn1–N1   | 92.10(16)  | O6–Mn2–N3   | 91.44(17)  | O1–Mn3–N5  | 88.79(16)  |
| O5–Mn1–N1   | 176.3(2)   | O8–Mn2–N3   | 177.60(19) | O2–Mn3–N5  | 167.5(2)   |
| O1–Mn1–O14  | 88.24(19)  | O1–Mn2–O12  | 90.6(2)    | O9–Mn3–Cl1 | 100.29(17) |
| O3–Mn1–O14  | 89.62(17)  | O6–Mn2–O12  | 92.2(2)    | O1–Mn3–Cl1 | 100.07(16) |
| O5–Mn1–O14  | 92.39(18)  | O8–Mn2–O12  | 93.8(2)    | O2–Mn3–Cl1 | 98.04(16)  |
| N1–Mn1–O14  | 90.49(19)  | N3–Mn2–O12  | 85.2(2)    | N5–Mn3–Cl1 | 94.23(17)  |
| O1–Mn1–O13  | 91.54(19)  | O1–Mn2–O11  | 88.61(18)  | Mn1–O1–Mn2 | 119.16(18) |
| O3–Mn1–O13  | 90.71(17)  | O6–Mn2–O11  | 88.70(18)  | Mn1–O1–Mn3 | 120.32(18) |
| O5–Mn1–O13  | 93.72(19)  | O8–Mn2–O11  | 90.99(18)  | Mn2–O1–Mn3 | 120.10(18) |
| N1–Mn1–O13  | 83.40(19)  | N3–Mn2–O11  | 90.02(18)  |            |            |
| O14–Mn1–O13 | 173.88(15) | O12–Mn2–O11 | 175.18(19) |            |            |

**Table S4** Selected bond lengths / Å and bond angles / ° of **2**.

|           |            |             |            |            |            |
|-----------|------------|-------------|------------|------------|------------|
| Mn1–O1    | 1.8800(19) | Mn1–Mn3     | 3.1621(7)  | Mn2–O10    | 2.345(2)   |
| Mn1–O2    | 1.881(2)   | Mn2–O4      | 1.877(2)   | Mn3–O6     | 1.876(2)   |
| Mn1–O7    | 1.917(2)   | Mn2–O1      | 1.9028(19) | Mn3–O1     | 1.9061(19) |
| Mn1–N2    | 2.007(2)   | Mn2–O3      | 1.960(2)   | Mn3–O5     | 1.910(2)   |
| Mn1–O8    | 2.136(2)   | Mn2–N4      | 2.001(2)   | Mn3–N6     | 1.989(2)   |
|           |            | Mn2–O11     | 2.242(2)   | Mn3–O9     | 2.147(2)   |
| O1–Mn1–O2 | 163.59(9)  | O4–Mn2–N4   | 90.95(9)   | O6–Mn3–O5  | 85.31(9)   |
| O1–Mn1–O7 | 93.28(8)   | O1–Mn2–N4   | 87.90(9)   | O1–Mn3–O5  | 90.77(8)   |
| O2–Mn1–O7 | 82.32(8)   | O3–Mn2–N4   | 171.93(10) | O6–Mn3–N6  | 91.16(9)   |
| O1–Mn1–N2 | 89.89(9)   | O4–Mn2–O11  | 90.21(9)   | O1–Mn3–N6  | 90.07(9)   |
| O2–Mn1–N2 | 91.16(9)   | O1–Mn2–O11  | 86.49(8)   | O5–Mn3–N6  | 167.55(10) |
| O7–Mn1–N2 | 167.10(10) | O3–Mn2–O11  | 88.35(9)   | O6–Mn3–O9  | 99.86(9)   |
| O1–Mn1–O8 | 91.24(8)   | N4–Mn2–O11  | 99.68(9)   | O1–Mn3–O9  | 93.01(8)   |
| O2–Mn1–O8 | 104.91(9)  | O4–Mn2–O10  | 88.55(9)   | O5–Mn3–O9  | 106.04(9)  |
| O7–Mn1–O8 | 96.03(9)   | O1–Mn2–O10  | 94.97(8)   | N6–Mn3–O9  | 86.32(9)   |
| N2–Mn1–O8 | 96.39(9)   | O3–Mn2–O10  | 82.79(8)   | Mn1–O1–Mn2 | 118.49(10) |
| O4–Mn2–O1 | 176.28(10) | N4–Mn2–O10  | 89.18(9)   | Mn1–O1–Mn3 | 113.27(10) |
| O4–Mn2–O3 | 89.69(9)   | O11–Mn2–O10 | 171.07(8)  | Mn2–O1–Mn3 | 119.48(10) |
| O1–Mn2–O3 | 91.94(8)   | O6–Mn3–O1   | 167.13(10) |            |            |

**Table S5** Selected bond lengths / Å and bond angles / ° of **3**.

|           |            |             |            |             |            |
|-----------|------------|-------------|------------|-------------|------------|
| Mn1–O1    | 1.889(3)   | Mn3–O6      | 1.926(3)   | Mn5–O11     | 1.890(3)   |
| Mn1–O7    | 1.919(3)   | Mn3–O1      | 1.930(3)   | Mn5–O10     | 1.917(3)   |
| Mn1–O2    | 1.960(3)   | Mn3–N3      | 1.993(4)   | Mn5–O8      | 1.918(3)   |
| Mn1–N5    | 2.000(4)   | Mn3–N10     | 2.342(5)   | Mn5–N14     | 1.991(4)   |
| Mn1–N7    | 2.318(4)   | Mn3–N9      | 2.368(4)   | Mn5–O15     | 2.303(4)   |
| Mn1–O9    | 2.347(3)   | Mn4–O8      | 1.892(3)   | Mn5–N18     | 2.337(4)   |
| Mn2–O3    | 1.862(3)   | Mn4–O9      | 1.922(3)   | Mn6–O13     | 1.865(3)   |
| Mn2–O1    | 1.879(3)   | Mn4–O14     | 1.947(3)   | Mn6–O8      | 1.875(3)   |
| Mn2–O4    | 1.901(3)   | Mn4–N12     | 2.008(4)   | Mn6–O12     | 1.904(3)   |
| Mn2–N1    | 1.983(4)   | Mn4–N17     | 2.277(4)   | Mn6–N16     | 1.987(4)   |
| Mn2–N8    | 2.234(4)   | Mn4–O7      | 2.334(3)   | Mn6–N19     | 2.207(5)   |
| Mn3–O5    | 1.891(3)   |             |            |             |            |
| O1–Mn1–O7 | 173.35(14) | O1–Mn3–N3   | 89.15(14)  | O8–Mn5–N14  | 89.47(14)  |
| O1–Mn1–O2 | 91.86(12)  | O5–Mn3–N10  | 83.39(16)  | O11–Mn5–O15 | 84.44(16)  |
| O7–Mn1–O2 | 90.36(12)  | O6–Mn3–N10  | 92.12(15)  | O10–Mn5–O15 | 91.88(16)  |
| O1–Mn1–N5 | 88.03(14)  | O1–Mn3–N10  | 96.76(15)  | O8–Mn5–O15  | 93.67(14)  |
| O7–Mn1–N5 | 90.19(14)  | N3–Mn3–N10  | 90.14(17)  | N14–Mn5–O15 | 89.81(17)  |
| O2–Mn1–N5 | 176.02(15) | O5–Mn3–N9   | 85.74(15)  | O11–Mn5–N18 | 87.15(15)  |
| O1–Mn1–N7 | 100.02(14) | O6–Mn3–N9   | 92.70(15)  | O10–Mn5–N18 | 90.71(15)  |
| O7–Mn1–N7 | 86.35(14)  | O1–Mn3–N9   | 94.15(14)  | O8–Mn5–N18  | 94.76(14)  |
| O2–Mn1–N7 | 86.82(14)  | N3–Mn3–N9   | 84.93(16)  | N14–Mn5–N18 | 87.41(16)  |
| N5–Mn1–N7 | 89.28(15)  | N10–Mn3–N9  | 167.96(15) | O15–Mn5–N18 | 171.10(14) |
| O1–Mn1–O9 | 99.54(12)  | O8–Mn4–O9   | 171.53(14) | O13–Mn6–O8  | 165.76(16) |
| O7–Mn1–O9 | 74.35(12)  | O8–Mn4–O14  | 91.86(12)  | O13–Mn6–O12 | 83.06(14)  |
| O2–Mn1–O9 | 86.33(12)  | O9–Mn4–O14  | 90.36(12)  | O8–Mn6–O12  | 92.91(13)  |
| N5–Mn1–O9 | 97.61(13)  | O8–Mn4–N12  | 88.27(14)  | O13–Mn6–N16 | 91.40(14)  |
| N7–Mn1–O9 | 159.46(13) | O9–Mn4–N12  | 89.91(14)  | O8–Mn6–N16  | 89.95(13)  |
| O3–Mn2–O1 | 165.51(16) | O14–Mn4–N12 | 177.18(15) | O12–Mn6–N16 | 168.23(16) |
| O3–Mn2–O4 | 82.13(14)  | O8–Mn4–N17  | 100.75(15) | O13–Mn6–N19 | 93.75(18)  |
| O1–Mn2–O4 | 93.23(13)  | O9–Mn4–N17  | 87.55(15)  | O8–Mn6–N19  | 100.28(16) |
| O3–Mn2–N1 | 92.10(15)  | O14–Mn4–N17 | 86.05(15)  | O12–Mn6–N19 | 96.28(17)  |
| O1–Mn2–N1 | 90.25(14)  | N12–Mn4–N17 | 91.16(16)  | N16–Mn6–N19 | 94.43(16)  |
| O4–Mn2–N1 | 169.57(17) | O8–Mn4–O7   | 97.37(12)  | Mn2–O1–Mn1  | 119.47(15) |
| O3–Mn2–N8 | 93.89(16)  | O9–Mn4–O7   | 74.60(12)  | Mn2–O1–Mn3  | 118.45(15) |
| O1–Mn2–N8 | 100.30(14) | O14–Mn4–O7  | 86.66(12)  | Mn1–O1–Mn3  | 119.77(15) |
| O4–Mn2–N8 | 96.80(16)  | N12–Mn4–O7  | 96.12(13)  | Mn1–O7–Mn4  | 105.74(13) |
| N1–Mn2–N8 | 92.23(15)  | N17–Mn4–O7  | 160.65(14) | Mn6–O8–Mn4  | 119.85(15) |
| O5–Mn3–O6 | 88.22(14)  | O11–Mn5–O10 | 87.68(14)  | Mn6–O8–Mn5  | 118.94(15) |
| O5–Mn3–O1 | 179.53(16) | O11–Mn5–O8  | 178.03(16) | Mn4–O8–Mn5  | 119.74(15) |
| O6–Mn3–O1 | 91.33(12)  | O10–Mn5–O8  | 91.82(13)  | Mn4–O9–Mn1  | 105.14(13) |
| O5–Mn3–N3 | 91.29(15)  | O11–Mn5–N14 | 91.08(15)  |             |            |
| O6–Mn3–N3 | 177.61(16) | O10–Mn5–N14 | 177.80(17) |             |            |



**Table S6** Selected bond lengths / Å and bond angles / ° of **4**.

|             |            |             |            |             |            |
|-------------|------------|-------------|------------|-------------|------------|
| Mn1–O2      | 1.904(3)   | Mn3–O16     | 2.079(3)   | Mn6–O11     | 1.933(3)   |
| Mn1–O5      | 1.906(3)   | Mn3–O2      | 2.685(3)   | Mn6–N5      | 2.008(4)   |
| Mn1–O1      | 1.927(3)   | Mn4–O4      | 1.895(3)   | Mn6–O22     | 2.156(3)   |
| Mn1–N2      | 2.002(3)   | Mn4–O17     | 1.897(3)   | Mn6–O5      | 2.649(3)   |
| Mn1–O7      | 2.065(3)   | Mn4–O2      | 1.926(3)   | Mn7–O20     | 1.871(3)   |
| Mn1–O3      | 2.684(3)   | Mn4–N14     | 2.018(3)   | Mn7–O2      | 1.906(3)   |
| Mn2–O1      | 1.884(3)   | Mn4–O19     | 2.068(3)   | Mn7–O6      | 1.922(3)   |
| Mn2–O13     | 1.906(3)   | Mn4–O1      | 2.813(3)   | Mn7–N15     | 2.011(3)   |
| Mn2–O3      | 1.926(3)   | Mn5–O15     | 1.873(3)   | Mn7–O23     | 2.195(3)   |
| Mn2–N10     | 2.028(3)   | Mn5–O4      | 1.891(3)   | Mn7–O12     | 2.599(3)   |
| Mn2–O9      | 2.074(3)   | Mn5–O18     | 1.934(3)   | Mn8–O8      | 1.866(3)   |
| Mn2–O4      | 2.774(4)   | Mn5–N12     | 2.009(3)   | Mn8–O1      | 1.892(3)   |
| Mn3–O12     | 1.895(3)   | Mn5–O21     | 2.188(3)   | Mn8–O14     | 1.951(3)   |
| Mn3–O3      | 1.898(3)   | Mn5–O13     | 2.550(3)   | Mn8–N3      | 2.015(4)   |
| Mn3–O4      | 1.922(3)   | Mn6–O10     | 1.869(3)   | Mn8–O24     | 2.161(3)   |
| Mn3–N7      | 2.008(3)   | Mn6–O3      | 1.900(3)   | Mn8–O17     | 2.626(3)   |
| O2–Mn1–O5   | 161.18(13) | O4–Mn4–N14  | 86.59(12)  | O20–Mn7–O23 | 93.31(14)  |
| O2–Mn1–O1   | 89.19(12)  | O17–Mn4–N14 | 88.97(13)  | O2–Mn7–O23  | 96.19(13)  |
| O5–Mn1–O1   | 92.30(13)  | O2–Mn4–N14  | 168.75(13) | O6–Mn7–O23  | 95.15(14)  |
| O2–Mn1–N2   | 87.00(13)  | O4–Mn4–O19  | 103.17(13) | N15–Mn7–O23 | 95.11(14)  |
| O5–Mn1–N2   | 89.07(13)  | O17–Mn4–O19 | 97.83(14)  | O20–Mn7–O12 | 93.39(12)  |
| O1–Mn1–N2   | 172.03(13) | O2–Mn4–O19  | 90.06(12)  | O2–Mn7–O12  | 77.87(11)  |
| O2–Mn1–O7   | 101.82(13) | N14–Mn4–O19 | 100.89(13) | O6–Mn7–O12  | 92.52(12)  |
| O5–Mn1–O7   | 96.96(14)  | O4–Mn4–O1   | 86.93(10)  | N15–Mn7–O12 | 77.58(12)  |
| O1–Mn1–O7   | 89.29(11)  | O17–Mn4–O1  | 74.18(11)  | O23–Mn7–O12 | 170.28(12) |
| N2–Mn1–O7   | 98.34(13)  | O2–Mn4–O1   | 66.09(10)  | O8–Mn8–O1   | 171.14(14) |
| O2–Mn1–O3   | 86.26(10)  | N14–Mn4–O1  | 103.53(11) | O8–Mn8–O14  | 86.97(12)  |
| O5–Mn1–O3   | 76.92(11)  | O19–Mn4–O1  | 154.07(10) | O1–Mn8–O14  | 89.64(11)  |
| O1–Mn1–O3   | 68.22(10)  | O15–Mn5–O4  | 171.07(14) | O8–Mn8–N3   | 91.63(14)  |
| N2–Mn1–O3   | 104.51(11) | O15–Mn5–O18 | 86.08(12)  | O1–Mn8–N3   | 90.52(13)  |
| O7–Mn1–O3   | 156.15(11) | O4–Mn5–O18  | 89.85(11)  | O14–Mn8–N3  | 171.47(14) |
| O1–Mn2–O13  | 159.12(14) | O15–Mn5–N12 | 92.51(13)  | O8–Mn8–O24  | 92.09(14)  |
| O1–Mn2–O3   | 88.56(12)  | O4–Mn5–N12  | 90.84(12)  | O1–Mn8–O24  | 96.39(13)  |
| O13–Mn2–O3  | 93.12(12)  | O18–Mn5–N12 | 174.84(15) | O14–Mn8–O24 | 95.69(13)  |
| O1–Mn2–N10  | 86.24(12)  | O15–Mn5–O21 | 92.29(14)  | N3–Mn8–O24  | 92.77(14)  |
| O13–Mn2–N10 | 88.76(13)  | O4–Mn5–O21  | 96.03(13)  | O–Mn8–O17   | 92.73(12)  |
| O3–Mn2–N10  | 170.04(13) | O18–Mn5–O21 | 95.77(13)  | O–Mn8–O17   | 79.13(11)  |
| O1–Mn2–O9   | 103.47(13) | N12–Mn5–O21 | 89.23(14)  | O–Mn8–O17   | 90.84(11)  |
| O13–Mn2–O9  | 97.36(14)  | O15–Mn5–O13 | 92.91(13)  | O–Mn8–O17   | 80.82(12)  |
| O3–Mn2–O9   | 89.75(12)  | O4–Mn5–O13  | 79.40(11)  | O–Mn8–O17   | 172.08(12) |
| N10–Mn2–O9  | 99.72(13)  | O18–Mn5–O13 | 93.65(12)  | Mn2–O1–Mn8  | 122.94(14) |
| O1–Mn2–O4   | 88.27(11)  | N12–Mn5–O13 | 81.46(12)  | Mn2–O1–Mn1  | 115.87(14) |

|             |            |             |            |            |            |
|-------------|------------|-------------|------------|------------|------------|
| O13-Mn2-O4  | 73.37(11)  | O21-Mn5-O13 | 169.53(11) | Mn8-O1-Mn1 | 121.17(14) |
| O3-Mn2-O4   | 66.87(11)  | O10-Mn6-O3  | 168.02(14) | Mn2-O1-Mn4 | 87.52(10)  |
| N10-Mn2-O4  | 104.44(11) | O10-Mn6-O11 | 84.65(13)  | Mn8-O1-Mn4 | 97.40(11)  |
| O9-Mn2-O4   | 153.78(10) | O3-Mn6-O11  | 89.24(12)  | Mn1-O1-Mn4 | 85.96(10)  |
| O12-Mn3-O3  | 159.60(13) | O10-Mn6-N5  | 92.74(14)  | Mn1-O2-Mn7 | 121.03(13) |
| O12-Mn3-O4  | 93.17(12)  | O3-Mn6-N5   | 91.60(13)  | Mn1-O2-Mn4 | 118.76(14) |
| O3-Mn3-O4   | 89.31(12)  | O11-Mn6-N5  | 170.40(15) | Mn7-O2-Mn4 | 119.96(14) |
| O12-Mn3-N7  | 88.91(13)  | O10-Mn6-O22 | 94.00(15)  | Mn1-O2-Mn3 | 88.91(10)  |
| O3-Mn3-N7   | 86.50(13)  | O3-Mn6-O22  | 96.78(13)  | Mn7-O2-Mn3 | 98.61(11)  |
| O4-Mn3-N7   | 173.17(13) | O11-Mn6-O22 | 94.87(14)  | Mn4-O2-Mn3 | 87.41(10)  |
| O12-Mn3-O16 | 96.23(14)  | N5-Mn6-O22  | 94.53(15)  | Mn3-O3-Mn6 | 121.89(14) |
| O3-Mn3-O16  | 104.07(13) | O10-Mn6-O5  | 92.17(12)  | Mn3-O3-Mn2 | 117.57(14) |
| O4-Mn3-O16  | 88.67(11)  | O3-Mn6-O5   | 77.89(11)  | Mn6-O3-Mn2 | 120.20(15) |
| N7-Mn3-O16  | 97.57(12)  | O11-Mn6-O5  | 93.47(12)  | Mn3-O3-Mn1 | 89.06(11)  |
| O12-Mn3-O2  | 75.82(11)  | N5-Mn6-O5   | 77.37(12)  | Mn6-O3-Mn1 | 99.11(11)  |
| O3-Mn3-O2   | 86.35(11)  | O22-Mn6-O5  | 170.04(12) | Mn2-O3-Mn1 | 87.34(10)  |
| O4-Mn3-O2   | 68.40(10)  | O20-Mn7-O2  | 169.19(14) | Mn5-O4-Mn4 | 122.55(14) |
| N7-Mn3-O2   | 105.91(11) | O20-Mn7-O6  | 84.31(13)  | Mn5-O4-Mn3 | 121.64(14) |
| O16-Mn3-O2  | 154.90(10) | O2-Mn7-O6   | 89.67(12)  | Mn4-O4-Mn3 | 115.75(13) |
| O4-Mn4-O17  | 159.00(14) | O20-Mn7-N15 | 92.30(14)  | Mn5-O4-Mn2 | 97.26(11)  |
| O4-Mn4-O2   | 88.44(12)  | O2-Mn7-N15  | 92.01(13)  | Mn4-O4-Mn2 | 88.47(10)  |
| O17-Mn4-O2  | 92.09(12)  | O6-Mn7-N15  | 169.36(14) | Mn3-O4-Mn2 | 86.24(10)  |

---

**Table S7** Selected bond lengths / Å and bond angles / ° of **5**.

|             |            |              |          |               |          |
|-------------|------------|--------------|----------|---------------|----------|
| Mn1–O9      | 2.108(9)   | Mn2–N4A      | 2.325(8) | Mn3–Mn4       | 3.020(2) |
| Mn1–O1A     | 2.239(6)   | Mn2–N2       | 2.337(7) | Mn4–O6A       | 2.023(5) |
| Mn1–O1      | 2.239(6)   | Mn2–N3B      | 2.356(7) | Mn4–O6        | 2.023(5) |
| Mn1–O1B     | 2.239(6)   | Mn3–O10      | 1.972(5) | Mn4–O6B       | 2.023(5) |
| Mn1–N1A     | 2.342(6)   | Mn3–O2A      | 1.988(6) | Mn4–O10B      | 2.027(6) |
| Mn1–N1      | 2.342(6)   | Mn3–O4       | 1.998(6) | Mn4–O10A      | 2.027(5) |
| Mn1–N1B     | 2.342(6)   | Mn3–O10B     | 1.999(5) | Mn4–O10       | 2.027(5) |
| Mn2–O10     | 2.088(5)   | Mn3–O9       | 2.000(4) | Mn4–Mn3B      | 3.020(2) |
| Mn2–O5B     | 2.220(6)   | Mn3–O8       | 2.021(7) | Mn4–Mn3A      | 3.020(2) |
| Mn2–O3      | 2.235(6)   | Mn3–Mn3B     | 2.997(2) |               |          |
| Mn2–O7A     | 2.238(7)   | Mn3–Mn3A     | 2.997(2) |               |          |
| O9–Mn1–O1A  | 132.25(16) | O5B–Mn2–N4A  | 149.8(3) | O9–Mn3–O8     | 168.9(2) |
| O9–Mn1–O1   | 132.25(16) | O3–Mn2–N4A   | 88.3(2)  | O6A–Mn4–O6    | 87.5(2)  |
| O1A–Mn1–O1  | 79.7(2)    | O7A–Mn2–N4A  | 68.7(3)  | O6A–Mn4–O6B   | 87.5(2)  |
| O9–Mn1–O1B  | 132.25(16) | O10–Mn2–N2   | 76.6(2)  | O6–Mn4–O6B    | 87.5(2)  |
| O1A–Mn1–O1B | 79.7(2)    | O5B–Mn2–N2   | 86.0(2)  | O6A–Mn4–O10B  | 88.8(2)  |
| O1–Mn1–O1B  | 79.7(2)    | O3–Mn2–N2    | 69.1(2)  | O6–Mn4–O10B   | 167.7(2) |
| O9–Mn1–N1A  | 75.50(16)  | O7A–Mn2–N2   | 149.5(2) | O6B–Mn4–O10B  | 104.0(2) |
| O1A–Mn1–N1A | 68.5(2)    | N4A–Mn2–N2   | 116.4(2) | O6A–Mn4–O10A  | 104.0(2) |
| O1–Mn1–N1A  | 148.1(2)   | O10–Mn2–N3B  | 76.5(2)  | O6–Mn4–O10A   | 88.8(2)  |
| O1B–Mn1–N1A | 91.3(2)    | O5B–Mn2–N3B  | 68.8(2)  | O6B–Mn4–O10A  | 167.7(2) |
| O9–Mn1–N1   | 75.50(16)  | O3–Mn2–N3B   | 148.8(2) | O10B–Mn4–O10A | 80.7(2)  |
| O1A–Mn1–N1  | 91.3(2)    | O7A–Mn2–N3B  | 87.0(3)  | O6A–Mn4–O10   | 167.7(2) |
| O1–Mn1–N1   | 68.5(2)    | N4A–Mn2–N3B  | 114.2(2) | O6–Mn4–O10    | 104.0(2) |
| O1B–Mn1–N1  | 148.1(2)   | N2–Mn2–N3B   | 114.4(2) | O6B–Mn4–O10   | 88.8(2)  |
| N1A–Mn1–N1  | 113.95(13) | O10–Mn3–O2A  | 169.8(2) | O10B–Mn4–O10  | 80.7(2)  |
| O9–Mn1–N1B  | 75.50(16)  | O10–Mn3–O4   | 90.6(2)  | O10A–Mn4–O10  | 80.7(2)  |
| O1A–Mn1–N1B | 148.1(2)   | O2A–Mn3–O4   | 86.9(2)  | Mn3B–O9–Mn3   | 97.1(3)  |
| O1–Mn1–N1B  | 91.3(2)    | O10–Mn3–O10B | 82.7(3)  | Mn3B–O9–Mn3A  | 97.1(3)  |
| O1B–Mn1–N1B | 68.5(2)    | O2A–Mn3–O10B | 100.6(2) | Mn3–O9–Mn3A   | 97.1(3)  |
| N1A–Mn1–N1B | 113.95(13) | O4–Mn3–O10B  | 171.4(2) | Mn3B–O9–Mn1   | 120.1(2) |
| N1–Mn1–N1B  | 113.95(13) | O10–Mn3–O9   | 82.3(2)  | Mn3–O9–Mn1    | 120.1(2) |
| O10–Mn2–O5B | 130.0(2)   | O2A–Mn3–O9   | 88.6(2)  | Mn3A–O9–Mn1   | 120.1(2) |
| O10–Mn2–O3  | 131.8(2)   | O4–Mn3–O9    | 102.9(2) | Mn3–O10–Mn3A  | 98.0(2)  |
| O5B–Mn2–O3  | 80.9(2)    | O10B–Mn3–O9  | 81.7(2)  | Mn3–O10–Mn4   | 98.1(2)  |
| O10–Mn2–O7A | 131.8(2)   | O10–Mn3–O8   | 103.5(2) | Mn3A–O10–Mn4  | 97.2(2)  |
| O5B–Mn2–O7A | 81.9(3)    | O2A–Mn3–O8   | 86.2(2)  | Mn3–O10–Mn2   | 119.8(3) |
| O3–Mn2–O7A  | 81.4(2)    | O4–Mn3–O8    | 86.6(3)  | Mn3A–O10–Mn2  | 119.1(3) |
| O10–Mn2–N4A | 77.4(3)    | O10B–Mn3–O8  | 89.6(2)  | Mn4–O10–Mn2   | 119.8(3) |

Symmetry codes: A)  $y + 1/2, -z + 1/2, -x + 1$ ; B)  $-z + 1, x - 1/2, -y + 1/2$ .

**Table S8** Bond Valence Sum (BVS) calculations for the Mn atoms in **1-6**.

| Complex  | Oxidation state* |      |      |      |      |      |      |      |
|----------|------------------|------|------|------|------|------|------|------|
|          | Mn1              | Mn2  | Mn3  | Mn4  | Mn5  | Mn6  | Mn7  | Mn8  |
| <b>1</b> | 3.27             | 3.35 | 2.93 |      |      |      |      |      |
|          | 3.02             | 3.09 | 2.71 |      |      |      |      |      |
| <b>2</b> | 3.22             | 3.24 | 3.21 |      |      |      |      |      |
|          | 2.97             | 2.99 | 2.96 |      |      |      |      |      |
| <b>3</b> | 3.13             | 3.24 | 3.15 | 3.17 | 3.24 | 3.26 |      |      |
|          | 2.89             | 2.99 | 2.91 | 2.92 | 2.99 | 3.00 |      |      |
| <b>4</b> | 3.29             | 3.27 | 3.30 | 3.27 | 3.26 | 3.25 | 3.23 | 3.24 |
|          | 3.03             | 3.00 | 3.04 | 3.01 | 3.01 | 3.00 | 2.98 | 2.99 |
| <b>5</b> | 1.99             | 2.04 | 3.44 | 3.18 |      |      |      |      |
|          | 1.83             | 1.88 | 3.17 | 2.93 |      |      |      |      |

\*There are two calculated results for the oxidation states of every Mn atom. The upper and below ones are obtained from the calculation based on Mn(II) and Mn(III) ions, respectively.

**Table S9** Hydrogen bonds for **1-3** [ $\text{\AA}$  and  $^\circ$ ].

| complex                                                                                       | D–H $\cdots$ A                                                                                    | d(D–H) | d(H $\cdots$ A) | d(D $\cdots$ A) | $\angle$ (DHA) |
|-----------------------------------------------------------------------------------------------|---------------------------------------------------------------------------------------------------|--------|-----------------|-----------------|----------------|
| <b>1</b>                                                                                      | O11–H111 $\cdots$ O15                                                                             | 0.85   | 1.89            | 2.730(7)        | 166.8          |
|                                                                                               | O11–H112 $\cdots$ O3A                                                                             | 0.85   | 1.95            | 2.778(5)        | 164.5          |
|                                                                                               | O11–H112 $\cdots$ N2A                                                                             | 0.85   | 2.54            | 3.202(6)        | 135.7          |
|                                                                                               | O13–H131 $\cdots$ O16B                                                                            | 0.85   | 1.84            | 2.695(8)        | 179.8          |
|                                                                                               | O13–H132 $\cdots$ O15                                                                             | 0.83   | 1.97            | 2.761(7)        | 156.8          |
|                                                                                               | O14–H141 $\cdots$ O6C                                                                             | 0.85   | 1.95            | 2.799(6)        | 179.5          |
|                                                                                               | O14–H141 $\cdots$ N4C                                                                             | 0.85   | 2.52            | 3.275(7)        | 148.3          |
|                                                                                               | O14–H142 $\cdots$ O12                                                                             | 0.84   | 2.28            | 3.025(8)        | 147.1          |
|                                                                                               | O14–H142 $\cdots$ Cl1                                                                             | 0.84   | 2.86            | 3.414(4)        | 124.7          |
|                                                                                               | Symmetry codes: A) $x - y + 1, x + 1, z + 1/6$ ; B) $x - 1, y, z$ ; C) $y - 1, -x + y, z - 1/6$ . |        |                 |                 |                |
| <b>2</b>                                                                                      | O10–H101 $\cdots$ O8                                                                              | 0.84   | 2.10            | 2.876(3)        | 153.5          |
|                                                                                               | O11–H111 $\cdots$ N1A                                                                             | 0.84   | 1.96            | 2.805(3)        | 174.9          |
| Symmetry code: A) $-x + 1, -y + 1, -z + 1$ .                                                  |                                                                                                   |        |                 |                 |                |
| <b>3</b>                                                                                      | O15–H151 $\cdots$ N20A                                                                            | 0.85   | 1.92            | 2.766(8)        | 171.2          |
|                                                                                               | O15–H152 $\cdots$ O23                                                                             | 0.86   | 2.39            | 2.930(12)       | 121.2          |
|                                                                                               | O24–H241 $\cdots$ O17B                                                                            | 0.86   | 2.17            | 3.031(11)       | 179.5          |
|                                                                                               | O24–H242 $\cdots$ O13B                                                                            | 0.86   | 2.23            | 2.999(8)        | 148.7          |
|                                                                                               | O24–H242 $\cdots$ N15B                                                                            | 0.86   | 2.70            | 3.302(8)        | 128.6          |
|                                                                                               | O25–H25 $\cdots$ O21                                                                              | 0.86   | 2.58            | 3.44(4)         | 178.2          |
|                                                                                               | O26–H261 $\cdots$ O18C                                                                            | 0.87   | 2.56            | 3.43(3)         | 178.6          |
|                                                                                               | O26–H262 $\cdots$ O27C                                                                            | 0.84   | 1.64            | 2.26(4)         | 128.0          |
|                                                                                               | O27–H271 $\cdots$ O24B                                                                            | 0.85   | 2.58            | 3.44(3)         | 177.9          |
|                                                                                               | O27–H272 $\cdots$ O26                                                                             | 0.84   | 2.23            | 2.726(10)       | 118.3          |
| Symmetry codes: A) $-x + 1, -y + 1, -z + 1$ ; B) $-x + 1, -y + 1, -z$ ; C) $-x, -y + 2, -z$ . |                                                                                                   |        |                 |                 |                |

**Table S10**  $\pi\cdots\pi$  interaction data of **1–4**.

| Two aromatic rings existing $\pi\cdots\pi$ interaction             | Dihedral<br>angle / ° | Center-to-center<br>distance / Å | Offset<br>angle / °    |
|--------------------------------------------------------------------|-----------------------|----------------------------------|------------------------|
| <b>1</b> intrachain $\pi\cdots\pi$ interaction                     |                       |                                  |                        |
| C1-C4,C9 and C22-C27 ( $-1 + y, -x + y, -1/6 + z$ )                | 3.782(1)              | 3.3948(1)                        | 5.695(2)               |
| C13-C18 and C10-C13,C18 ( $-1 + y, -x + y, -1/6 + z$ )             | 2.895(1)              | 3.4699(1)                        | 6.107(2)               |
| interchain $\pi\cdots\pi$ interaction                              |                       |                                  |                        |
| C22-C27 and C1-C4,C9 ( $y, -x + y, -1/6 + z$ )                     | 2.754(2)              | 3.6164(1)                        | 19.999(2)              |
| C19-C22,C27 and C4-C9 ( $y, -x + y, -1/6 + z$ )                    | 2.278                 | 3.6590(1)                        | 20.638(2) <sup>o</sup> |
| <b>2</b> Intra-dimer $\pi\cdots\pi$ interaction                    |                       |                                  |                        |
| C25-C29 and C3,C4,C9-C12 ( $1 - x, 1 - y, 1 - z$ )                 | 2.657(2)              | 3.7115(5)                        | 25.965(5)              |
| inter-dimer $\pi\cdots\pi$ interaction                             |                       |                                  |                        |
| C25-C29 and C15,C16,C21-C24 ( $-x, -0.5 + y, 0.5 - z$ )            | 3.076(2)              | 3.5927(5)                        | 18.250(3)              |
| C28-C33 and C13-C17 ( $-x, -0.5 + y, 0.5 - z$ )                    | 1.643(2)              | 3.6512(5)                        | 19.419(4)              |
| C1-C12 and C13-C24 ( $x, 1.5 - y, 0.5 + z$ )                       | 5.278(2)              | 3.5816(4)                        | 15.105(4)              |
| <b>3</b> $\pi\cdots\pi$ interactions for the formation of 2D sheet |                       |                                  |                        |
| C15-C24 and C71-C80 ( $1 + x, -1 + y, z$ )                         | 1.729(2)              | 3.7036(2)                        | 22.190(3)              |
| C27-C36 and C27-C36 ( $1 - x, 1 - y, -z$ )                         | 0                     | 3.6243(1)                        | 18.612(1)              |
| $\pi\cdots\pi$ interactions for the formation of 3D structure      |                       |                                  |                        |
| C72-C77 and C4-C9 ( $1 - x, 1 - y, 1 - z$ )                        | 5.801(1)              | 3.6731(1)                        | 16.071(2)              |
| C4-C9 and C72-C77 ( $1 - x, 1 - y, 1 - z$ )                        | 5.801(1)              | 3.6731(1)                        | 16.071(2)              |
| C60-C65 and C60-C65 ( $2 - x, 1 - y, 1 - z$ )                      | 0                     | 3.5574(1)                        | 11.453(2)              |
| <b>4</b> For chain                                                 |                       |                                  |                        |
| C52-C57 and C52-C57 ( $1 - x, 1 - y, 1 - z$ )                      | 0                     | 3.7246(4)                        | 26.657(2)              |
| C76-C81 and C76-C81 ( $1 - x, 2 - y, 1 - z$ )                      | 0                     | 3.8304(4)                        | 25.861(2)              |

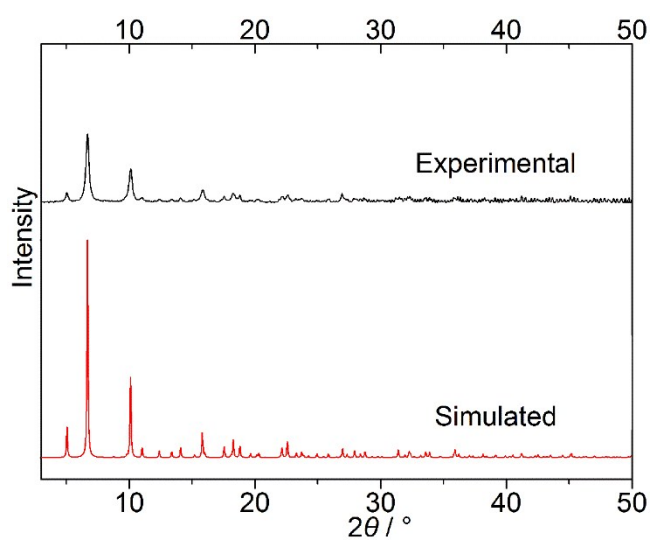

**Fig. S1** PXRD patterns of **1**.

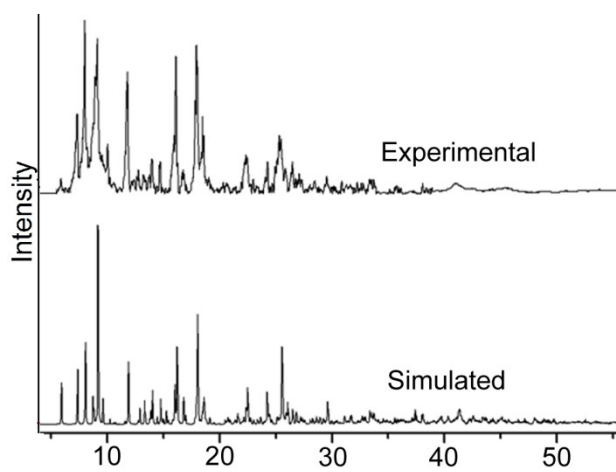

**Fig. S2** PXRD patterns of **2**.

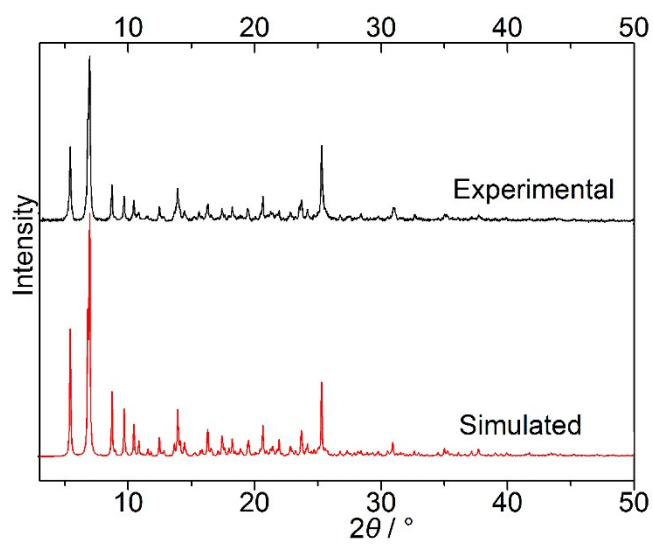

**Fig. S3** PXR D patterns of **3**.

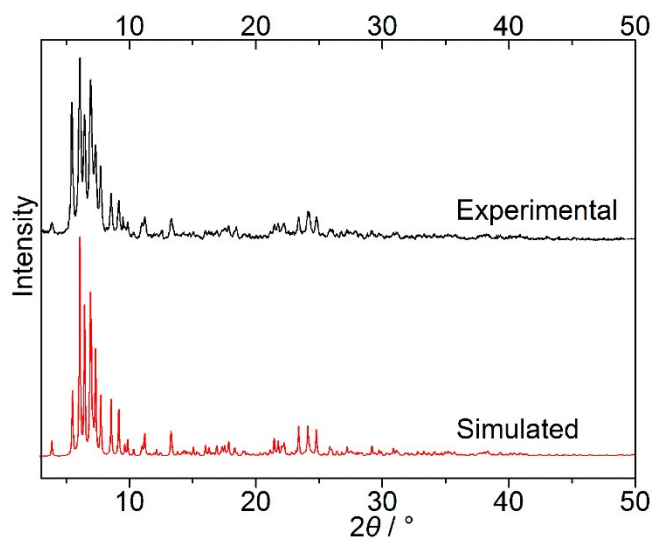

**Fig. S4** PXR D patterns of **4**.



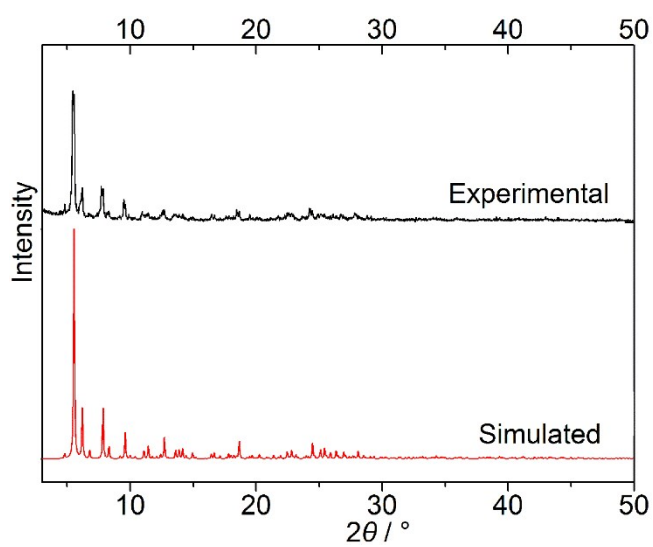

**Fig. S5** PXR D patterns of **5**.

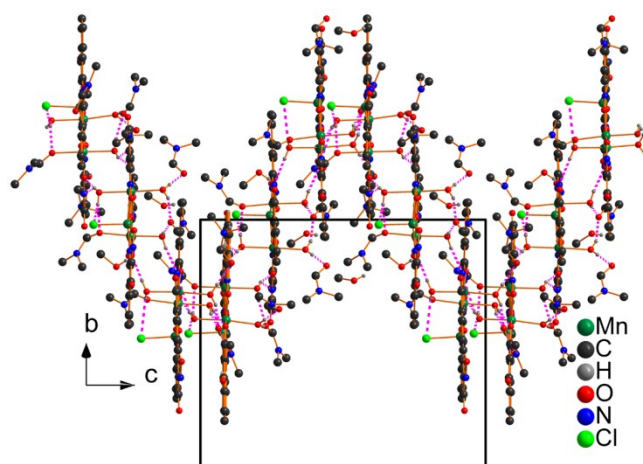

**Fig. S6** One-dimensional supramolecular H-bonded chain of **1**. Purple broken lines represent hydrogen bonds.

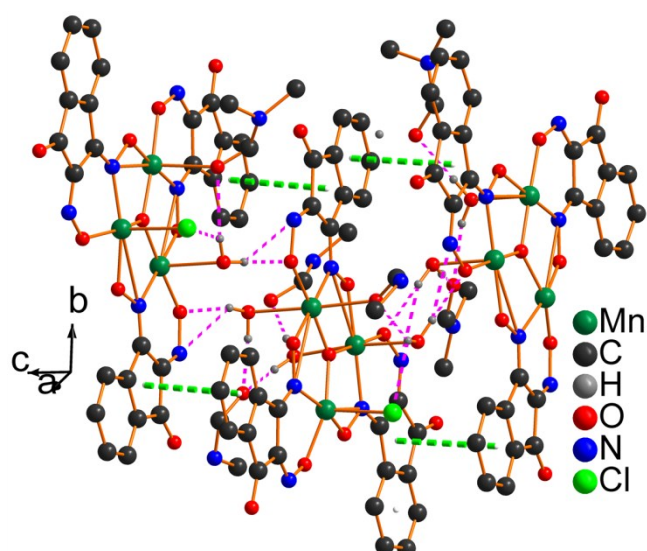

**Fig. S7** A show of the hydrogen bonds (purple broken lines) and  $\pi \cdots \pi$  stacking interactions (green broken lines) in the supramolecular one-dimensional chain of **1**.

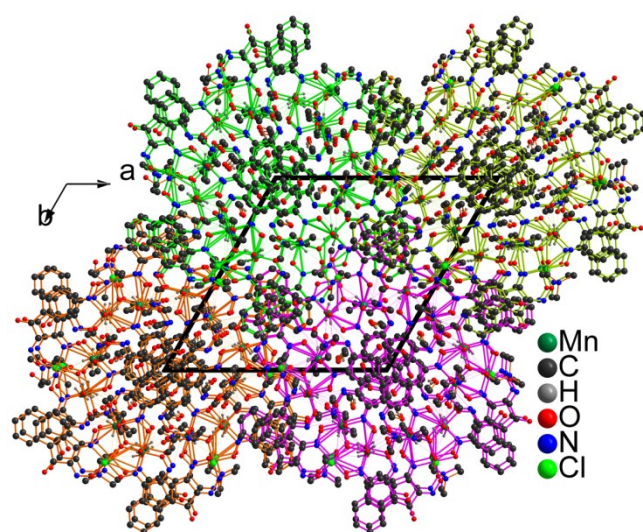

**Fig. S8** A show of the three-dimensional supramolecular structure of **1** formed from one-dimensional supramolecular chains by  $\pi \cdots \pi$  stacking interactions. The bonds in different chains are highlighted with different colors.

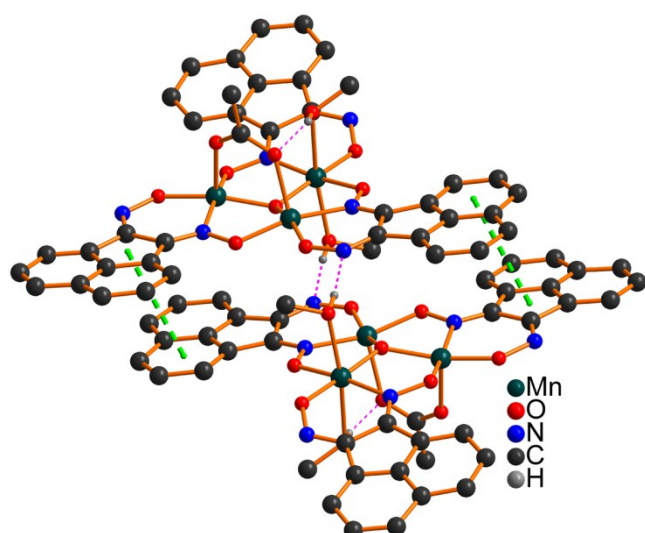

**Fig. S9** The dimer of **2** formed by hydrogen bonds (purple broken lines) and  $\pi \cdots \pi$  stacking interactions (green broken lines).

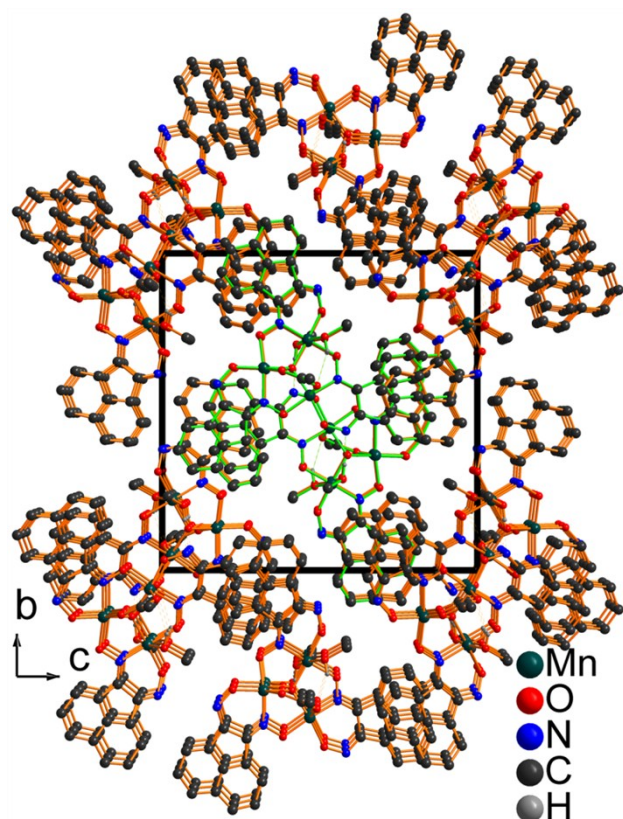

**Fig. S10** Packing diagram of the dimers in **2** by  $\pi \cdots \pi$  stacking interactions. The bonds in one dimer are highlighted with green color.

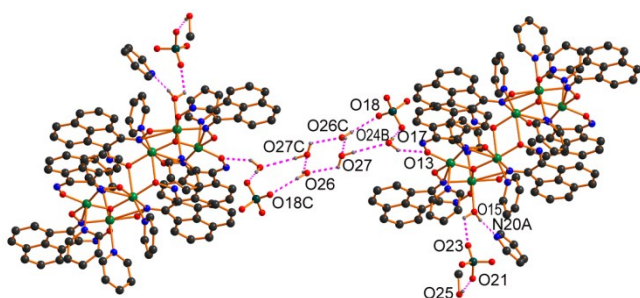

**Fig. S11** The dimer of **3** formed by hydrogen bonds (purple broken lines).

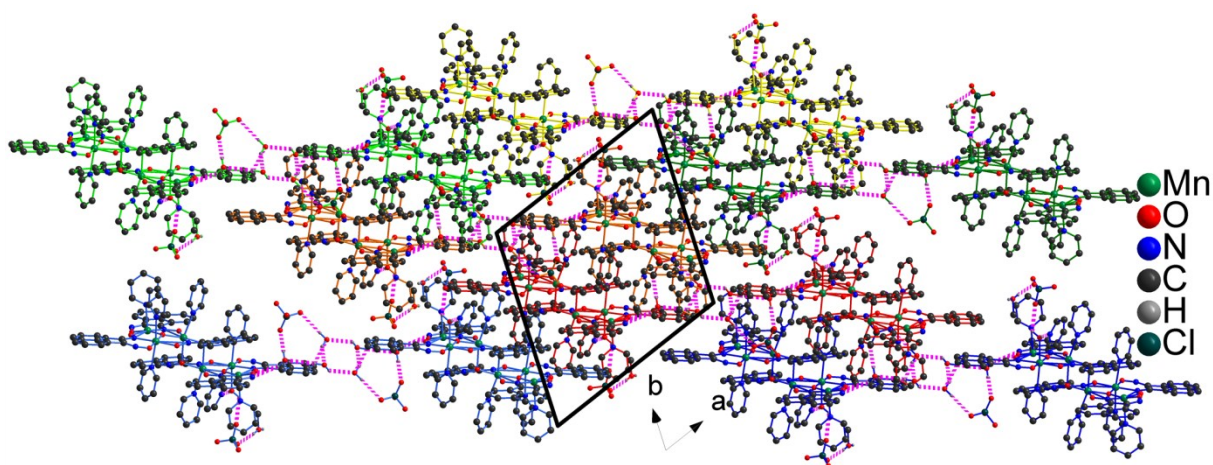

**Fig. S12** Two-dimensional supramolecular sheet of **3** in the ab plane formed from the dimers through  $\pi \cdots \pi$  stacking interactions.

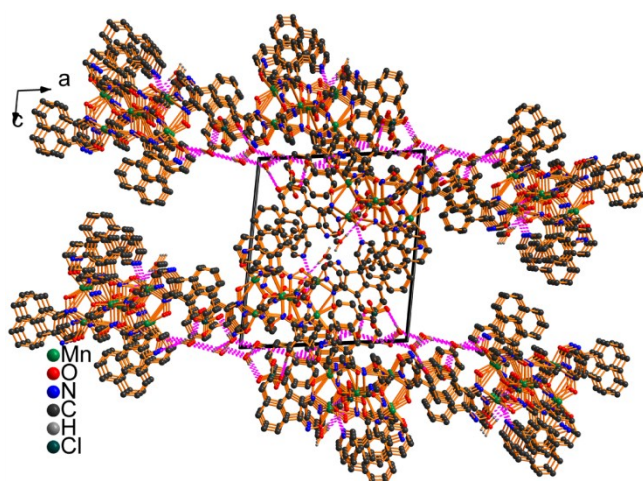

**Fig. S13** Three-dimensional supramolecular structure of **3** formed from the supramolecular sheets through  $\pi \cdots \pi$  stacking interactions.

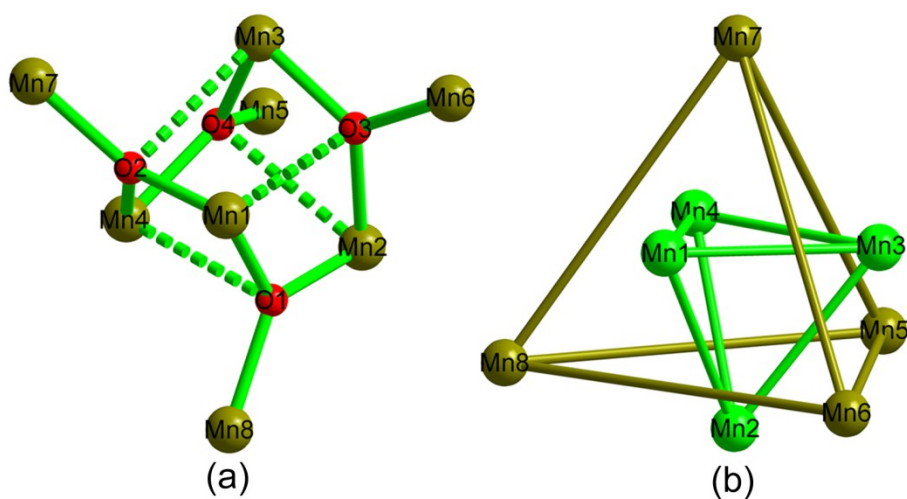

**Fig. S14** a) The  $\text{Mn}_8\text{O}_4^{16+}$  skeleton in **4** with the weak Mn–O bonds represented by broken lines. b) A schematic show of the inner and outer tetrahedral  $\text{Mn}_4$  skeletons of **4**.

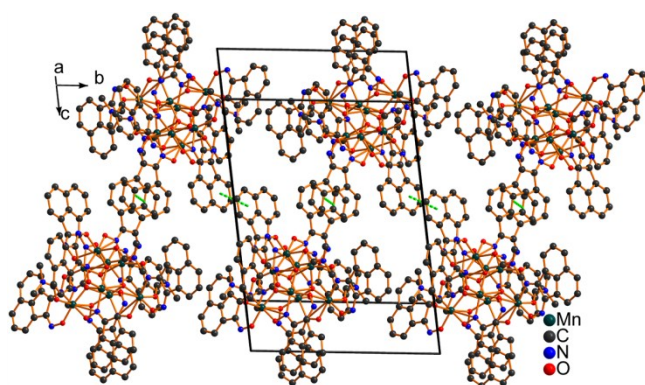

**Fig. S15** One-dimensional supramolecular chain of **4** formed from octanuclear units by  $\pi \cdots \pi$  stacking interactions (green broken lines).

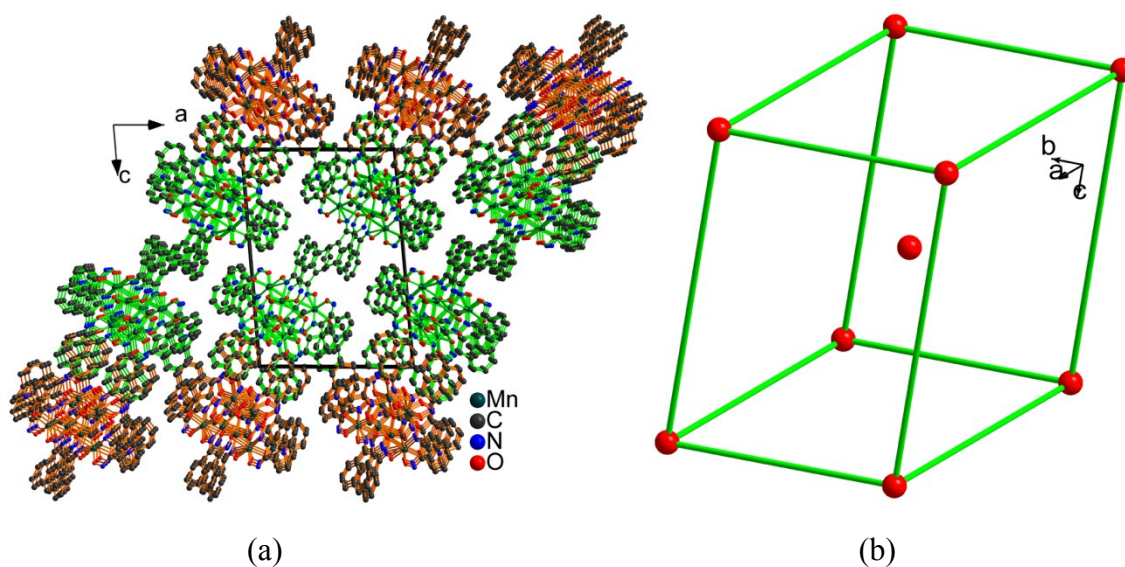

**Fig. S16** a) Packing diagram of **4** with the one-dimensional supramolecular chain highlighted by green colors. b) A schematic show of the packing diagram of the trinuclear units (red spheres) of **4**.

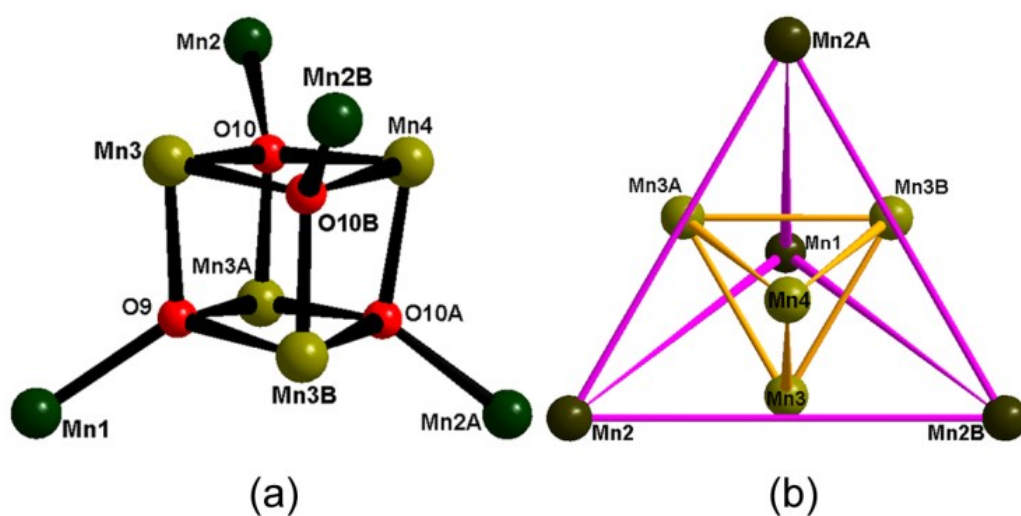

**Fig. S17** a) The  $[\text{Mn}^{\text{II}}_4\text{Mn}^{\text{III}}_4\text{O}_4]^{12+}$  skeleton in **5**. b) A schematic show of the inner and outer tetrahedral  $\text{Mn}_4$  skeletons of **5**.

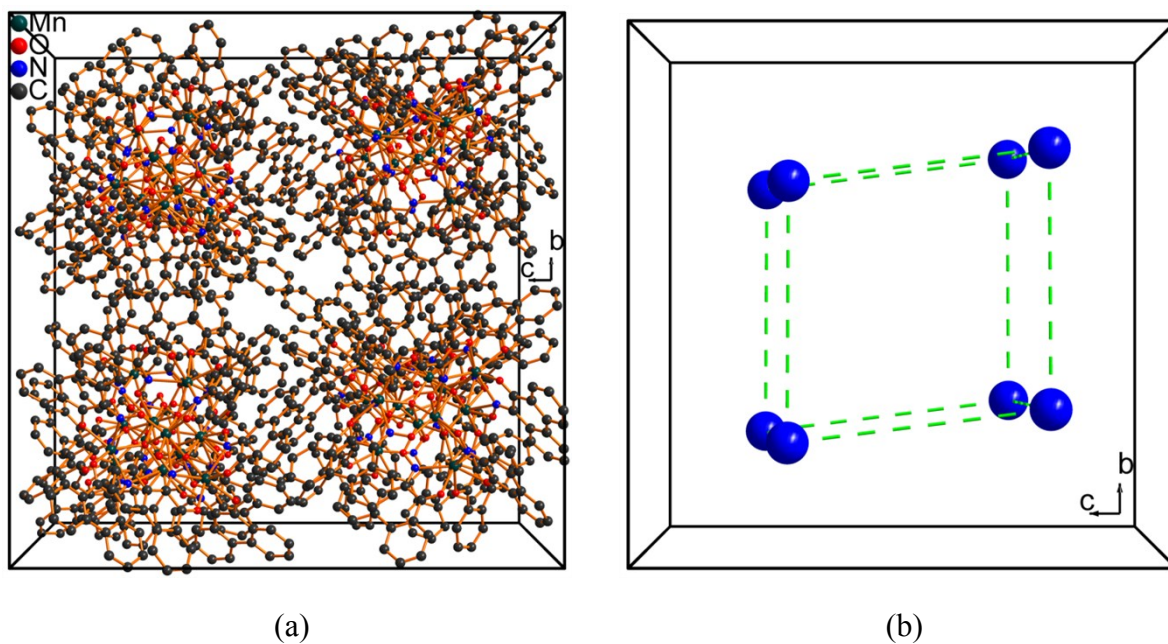

**Fig. S18** a) A packing diagram of the octanuclear nuclear units of **5** with all solvent molecules and hydrogen atoms omitted. b) A schematic show of the octanuclear nuclear units (blue spheres) of **5**.

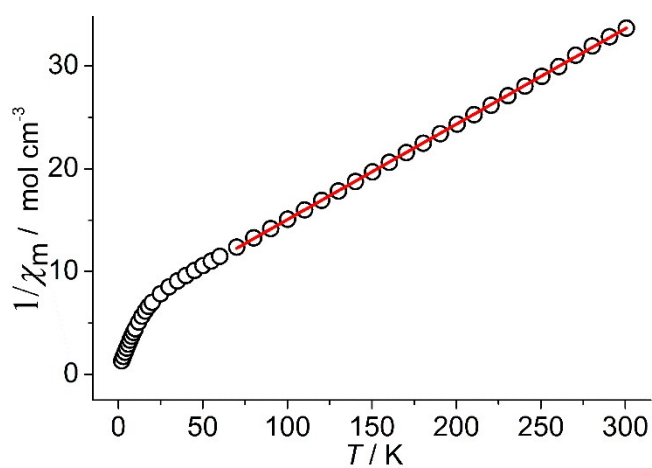

**Fig. S19** The plot of  $\chi_m^{-1}$  vs  $T$  for **1** in the temperature range of 2.0-300 K. The solid line represents the fitting by Curie-Weiss law in the temperature range of 70-300 K.

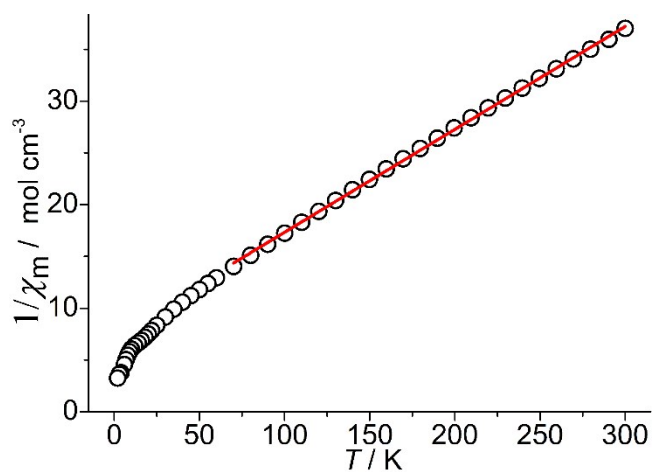

**Fig. S20** The plot of  $\chi_m^{-1}$  vs  $T$  for **2** in the temperature range of 2.0-300 K. The solid line represents the fitting by Curie-Weiss law in the temperature range of 70-300 K.

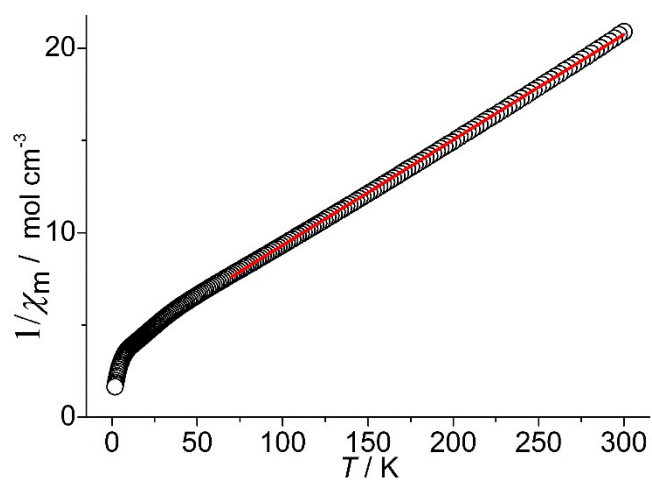

**Fig. S21** The plot of  $\chi_m^{-1}$  vs  $T$  for **3** in the temperature range of 1.8-300 K. The solid line represents the fitting by Curie-Weiss law in the temperature range of 70-300 K.



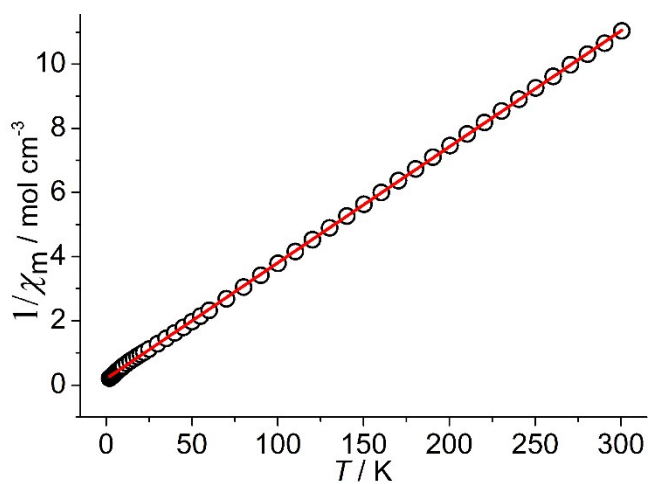

**Fig. S22** The plot of  $\chi_m^{-1}$  vs  $T$  for **4** in the temperature range of 2.0-300 K. The solid line represents the fitting by Curie-Weiss law.

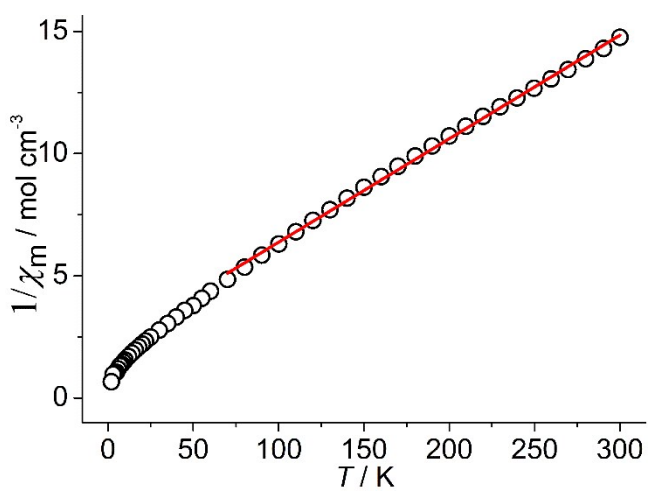

**Fig. S23** The plot of  $\chi_m^{-1}$  vs  $T$  for **5** in the temperature range of 2.0-300 K. The solid line represents the fitting by Curie-Weiss law.

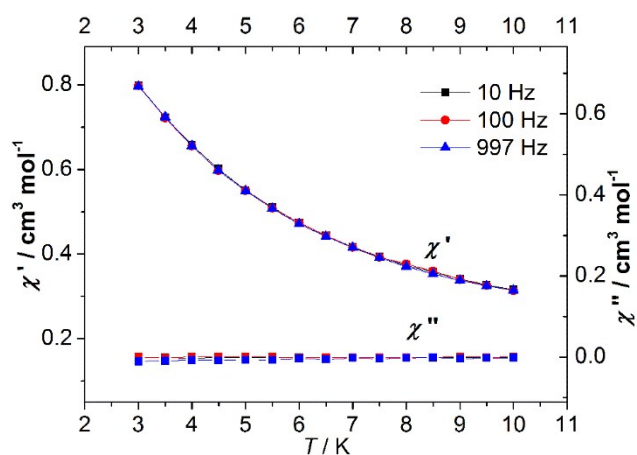

**Fig. S24** Temperature-dependent ac magnetic susceptibilities of **1** under different frequencies with a zero DC field and an oscillating field of 2.5 Oe. Solid lines are guides for the eye.

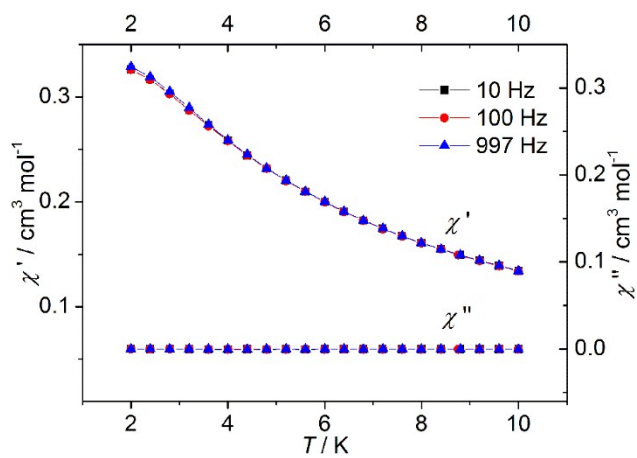

**Fig. S25** Temperature-dependent ac magnetic susceptibilities of **2** under different frequencies with a zero DC field and an oscillating field of 2.5 Oe. Solid lines are guides for the eye.

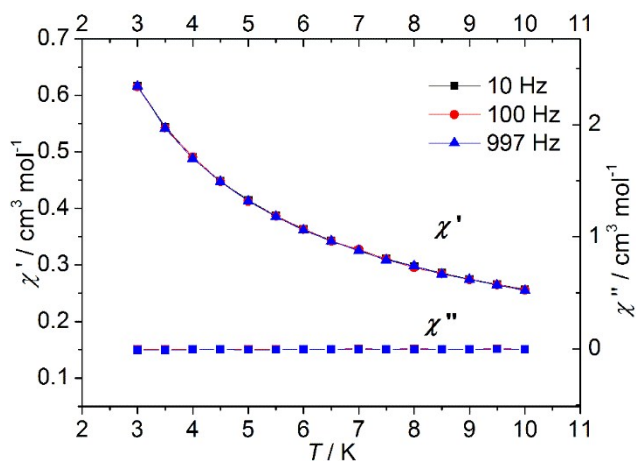

**Fig. S26** Temperature-dependent ac magnetic susceptibilities of **3** under different frequencies with a zero DC field and an oscillating field of 2.5 Oe. Solid lines are guides for the eye.

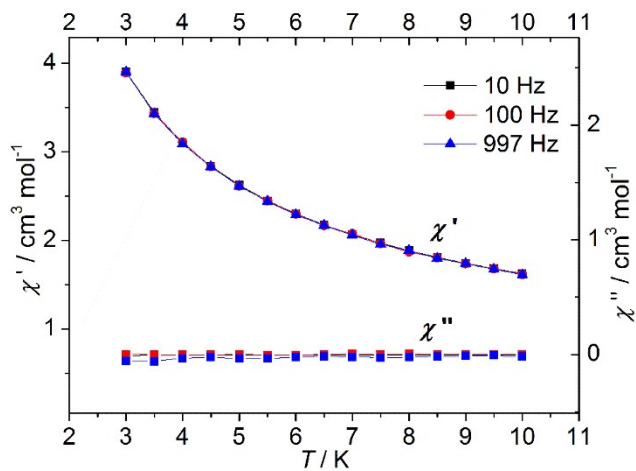

**Fig. S27** Temperature-dependent ac magnetic susceptibilities of **4** under different frequencies with a zero DC field and an oscillating field of 2.5 Oe. Solid lines are guides for the eye.

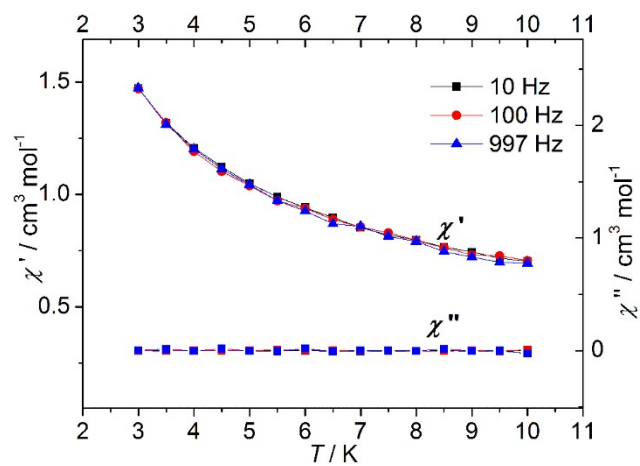

**Fig. S28** Temperature-dependent ac magnetic susceptibilities of **5** under different frequencies

with a zero DC field and an oscillating field of 2.5 Oe. Solid lines are guides for the eye.
